# Supplementary material
Source: PubMed Central journal article supplement (PMC5313109)
Supplement: supp_M116.766048_Supplementary_Files.pdf [file supp_M116.766048_Supplementary_Files.pdf]

## SUPPLEMENTARY INFORMATION

Concerted upregulation of aldehyde/alcohol dehydrogenase (ADHE) and starch in *Chlamydomonas reinhardtii* increases survival under dark anoxia

**Robert van Lis<sup>1,2</sup>, Marion Poppek<sup>1</sup>, Yohann Couté<sup>3,4,5</sup>, Artemis Kosta<sup>6</sup>, Dominique Drapier<sup>7</sup>,  
Wolfgang Nitschke<sup>1</sup> and Ariane Atteia<sup>1,†</sup>**

<sup>1</sup>Aix Marseille Univ, CNRS, the Unité de Bioénergétique et Ingénierie des Protéines-UMR 7281, 31  
Chemin Joseph Aiguier, F-13402 Marseille, France

<sup>2</sup>INRA, Laboratoire de Biotechnologie de l'Environnement, Narbonne, France

<sup>3</sup>Université Grenoble Alpes, BIG-BGE, F-38000 Grenoble, France

<sup>4</sup>Commissariat à l'Energie Atomique, BIG-BGE, F-38000 Grenoble, France

<sup>5</sup>INSERM, BGE, F-38000 Grenoble, France

<sup>6</sup>Microscopy core facility, FR3479 Institut de Microbiologie de la Méditerranée  
31 chemin Joseph Aiguier, 13402 Marseille cedex 20, France

<sup>7</sup>UMR 7141, CNRS and Université Pierre et Marie Curie (UPMC - Paris 06), Institut de Biologie  
Physico-Chimique, 13 rue Pierre et Marie Curie, F-75005 Paris, France

**Supplemental Data Set 1.** Species used for the phylogenetic analysis presented in Figure 2

**Supplemental Data Set 2.** Multiple sequence alignment of ADHEs.

### Supplemental Figures:

**FIGURE S1.** Sensitivity and specificity of the anti-ADHE serum.

**FIGURE S2.** Mutant RBCL of *C. reinhardtii* strain 10-6C: identification by mass spectrometry.

**FIGURE S3.** Identification of *C. reinhardtii* ADHE by mass spectrometry.

**FIGURE S4.** Immunoblot analysis of cells incubated in dark anoxia in presence of sodium hypophosphite, an inhibitor of PFL.

**FIGURE S5.** ADHE abundance in conditions of zinc-deficiency.

**FIGURE S6.** Production of antibodies to *C. reinhardtii* phosphotransacetylases.

**FIGURE S7.** Identification of *C. reinhardtii* PTAs by mass spectrometry.

**FIGURE S1. Sensitivity and specificity of the anti-ADHE serum.**

- Proteins were separated on urea/SDS-PAGE (6M urea/5-12% acrylamide) and transferred to nitrocellulose membrane. rADHE, recombinant ADHE. Left: membrane was stained with Ponceau red S; right: membrane was probed for ADHE, using the anti-ADHE antibodies at a dilution of 1:2,500.

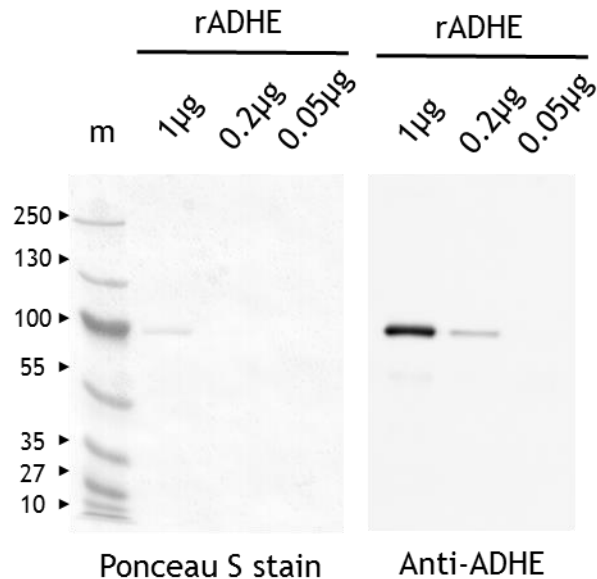

- Proteins were separated on SDS-PAGE (5-12% acrylamide) and transferred to nitrocellulose membrane. Lane 1, recombinant ADHE (0.15 µg); lane 2, cell extract from *C. reinhardtii* wild-type strain CC-124 (40 µg proteins); lane 3, cell extract from *C. reinhardtii* mutant strain 10-6C (40 µg proteins). Left: membrane was stained with Ponceau red S; right: membrane was probed for ADHE, using the anti-ADHE antibodies as above.

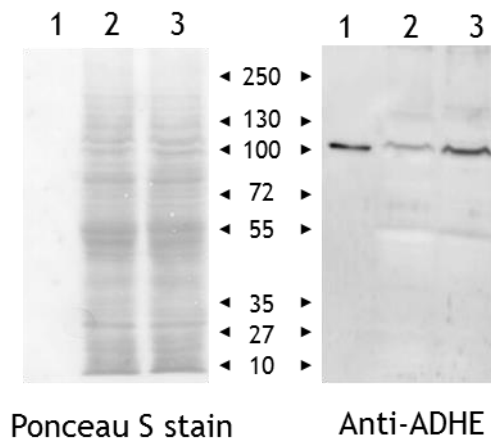

**FIGURE S2. Mutant RBCL in *C. reinhardtii* strain 10-6C: identification by mass spectrometry.**

- Chloroplasts from strain 10-6C were loaded on a urea/SDS-PAGE. The gel piece in the 40-kDa region was subjected to nanoLC-MS/MS analysis.

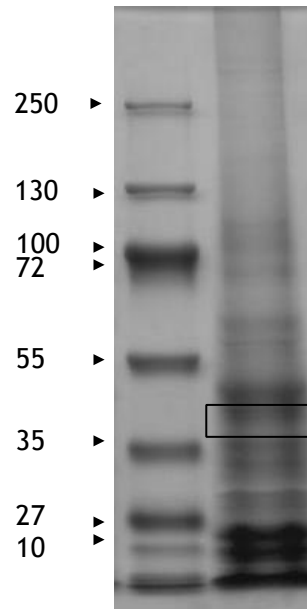

- **Sequence alignment of wild-type and mutant RBCLs.** Tryptic peptides that match mutated RBCL protein are indicated, including the peptide that covers the mutation (Gly -> Asp).

|           |                                                              |                         |                     |
|-----------|--------------------------------------------------------------|-------------------------|---------------------|
| Wild-type | MVPQTETKAGAGFKAGVKDYRLTYYPDYVVR                              | DTDILAAFR               | MTPQPGVPPEECGAAVAAE |
| Mutant    | MVPQTETKAGAGFKAGVKDYRLTYYPDYVVR                              | DTDILAAFR               | MTPQPGVPPEECGAAVAAE |
| *****     |                                                              |                         |                     |
| Wild-type | SSTGTWTTVWTDGLTSLDRYKGRCDYIEPVPGEDNQYIAYVAYPIDLFEEGSVTNMFTSI |                         |                     |
| Mutant    | SSTGTWTTVWTDGLTSLDRYKGRCDYIEPVPGEDNQYIAYVAYPIDLFEEGSVTNMFTSI |                         |                     |
| *****     |                                                              |                         |                     |
| Wild-type | VGNVFGFKALRALRLEDLRIPPAYVKTFVGPPIHQVERDKLNKYGR               | GLLCTIKPKLGL            |                     |
| Mutant    | VGNVFGFKALRALRLEDLRIPPAYVKTFVGPPIHQVERDKLNKYGR               | GLLDCTIKPKLGL           |                     |
| *****     |                                                              |                         |                     |
| Wild-type | SAKNYGRAVYECLRGGLDFTKDDENVNSQPFMRWRDR                        | FLFVAEAIYKAQAETGEVKGHYL |                     |
| Mutant    | SAKNYGRAVYECLRGGLDFTKDDENVNSQPFMRWRDR                        | FLFVAEAIYKAQAETGEVKGHYL |                     |
| *****     |                                                              |                         |                     |
| Wild-type | NATAGTCEEMMKRAVCAKELGVPIIMHDYLTGGFTANTSLAIYCR                | DNGLLLHIHRAMHAV         |                     |
| Mutant    | NATAGTCEEMMKRAVCAKELGVPIIMHDYLTGGFTANTSLAIYCR                | DNGLLLHIHRAMHAV         |                     |
| *****     |                                                              |                         |                     |
| Wild-type | IDRQRNHGIHFRVLAKALRMSGGDHLHSGTVVVGKLEGERE                    | EVTLGFVDLMR             | DDYVEKDRSR          |
| Mutant    | IDRQRNHGIHFRVLAKALRMSGGDHLHSGTVVVGKLEGERE                    | EVTLGFVDLMR             | DDYVEKDRSR          |
| *****     |                                                              |                         |                     |
| Wild-type | GIYFTQDWCSPMGVMPVASGGIHVWHMPALVEIFGDDACLQFGGGTLGHPWGNAPGAAAN |                         |                     |
| Mutant    | GIYFTQDWCSPMGVMPVASGGIHVWHMPALVEIFGDDACLQFGGGTLGHPWGNAPGAAAN |                         |                     |
| *****     |                                                              |                         |                     |
| Wild-type | RVALEACTQARNEGRDLAREGGDVIRSACK                               | WSPELAAACEVWKE          | EIKFEFDTIDK         |
| Mutant    | RVALEACTQARNEGRDLAREGGDVIRSACK                               | WSPELAAACEVWKE          | EIKFEFDTIDK         |
| *****     |                                                              |                         |                     |

### FIGURE S3. Identification of *C. reinhardtii* ADHE by mass spectrometry

●List of the tryptic peptides that match the ADHE sequence (Phytozome accession number g18056). Peptides were identified in 3 independent nanoLC-MS/MS analyses: *gel band*: chloroplast proteins in 100-kDa region; *stacking 1*, chloroplast soluble proteins; and *stacking 2*, whole cells.

| Peptide sequence                       | Position |      | gel band       |               | stacking 1     |               | stacking 2     |               |
|----------------------------------------|----------|------|----------------|---------------|----------------|---------------|----------------|---------------|
|                                        | Start    | Stop | Spectral Count | Highest score | Spectral Count | Highest score | Spectral Count | Highest score |
| AEEAAPVAAAPATPHAEVK                    | 54       | 72   | 1              | 40.63         | 1              | 37.91         |                |               |
| AEEAAPVAAAPATPHAEVKK                   | 54       | 73   | 2              | 41.53         | 1              | 46.61         | 1              | 25.64         |
| ERAPATDEALTELK                         | 74       | 87   | 1              | 69.03         | 2              | 62.75         | 2              | 63.27         |
| APATDEALTELK                           | 76       | 87   | 1              | 77.70         | 1              | 79.12         | 1              | 53.21         |
| RAQTAQAQYSTYTQEQVDEIFR                 | 92       | 113  |                |               | 1              | 53.60         |                |               |
| AQTAQAQYSTYTQEQVDEIFR                  | 93       | 113  | 1              | 136.06        | 2              | 104.36        | 2              | 119.00        |
| NHFASEFIYNK                            | 146      | 156  | 1              | 61.34         | 1              | 60.90         | 2              | 54.80         |
| TCGVIEHDPAGGIQK                        | 162      | 176  | 2              | 88.75         | 2              | 96.77         | 2              | 83.08         |
| VAEPVGVIAIVPTTNPSTAIK                  | 177      | 200  | 2              | 71.88         | 2              | 58.46         | 1              | 32.24         |
| NALVLCPPHR                             | 209      | 218  |                |               |                |               | 1              | 44.21         |
| AAYSNGNPSLGVGAGNTPALIDETADVAMAVSSILLSK | 278      | 315  | 1              | 25.53         | 1              | 33.28         |                |               |
| TFDNGVICASEQSVVVVAK                    | 316      | 334  |                |               | 1              | 98.25         | 1              | 91.52         |
| RGAYFLTEDDKVK                          | 346      | 358  | 1              | 47.37         |                |               | 1              | 40.16         |
| GAYFLTEDDKVK                           | 347      | 358  | 1              | 73.87         | 1              | 51.59         | 1              | 48.91         |
| LNPNIQGQSIK                            | 369      | 380  | 1              | 83.04         | 1              | 69.30         | 1              | 72.70         |
| LAALFGIK                               | 381      | 388  | 1              | 55.48         | 1              | 50.57         | 2              | 43.48         |
| VLIGEVEK                               | 395      | 402  |                |               |                |               | 1              | 36.45         |
| VLIGEVEKIGPEEALSQEK                    | 395      | 413  | 1              | 39.44         |                |               |                |               |
| IGPEEALSQEK                            | 403      | 413  | 1              | 59.36         | 2              | 40.93         | 3              | 64.23         |
| LCPILAMYR                              | 414      | 422  | 2              | 31.23         |                |               |                |               |
| MACELIMYGGAGHTSVLYTNPLNNAHIQQYQSAVK    | 432      | 466  |                |               |                |               | 3              | 27.58         |
| ENMLWFR                                | 525      | 531  | 1              | 35.84         | 1              | 36.86         | 1              | 26.61         |
| GGCLEVALTDLR                           | 540      | 551  | 1              | 94.51         | 2              | 95.03         | 2              | 86.84         |
| AFIVTDKPLFDMGYADK                      | 556      | 572  |                |               | 1              | 34.71         | 4              | 83.15         |
| VTHILDSINVHHQVFYHVTPDPTLACIEAGLK       | 573      | 604  |                |               |                |               | 1              | 23.46         |
| EILEFKPDVIALGGGSPMDAAK                 | 605      | 627  |                |               |                |               | 2              | 80.22         |
| IMWLMYECPDTR                           | 628      | 639  | 2              | 78.58         | 2              | 74.95         | 1              | 63.07         |
| FDGLAMR                                | 640      | 646  | 1              | 41.84         | 1              | 38.04         |                |               |
| VYEVPELQK                              | 654      | 662  |                |               | 1              | 29.54         |                |               |
| KATMVCIPPTSGTGSEVTPFVSVTDER            | 663      | 689  |                |               | 1              | 42.89         |                |               |
| ATMVCIPPTSGTGSEVTPFVSVTDER             | 664      | 689  | 1              | 47.29         | 3              | 94.16         | 2              | 79.97         |
| YPLADYALTPSMAIVDPQLVLNMPK              | 694      | 718  | 5              | 72.20         | 3              | 91.93         | 3              | 94.95         |
| EAISLLFK                               | 751      | 758  | 1              | 46.66         | 1              | 46.76         | 1              | 46.54         |
| AYANGSNDYLAR                           | 763      | 774  |                |               |                |               | 1              | 58.43         |
| LGAAYHVPHGLANAALISHVIR                 | 803      | 824  | 2              | 39.67         |                |               |                |               |
| YNATDMPAK                              | 825      | 833  | 1              | 47.89         | 1              | 50.74         | 1              | 57.09         |
| QAAFPQYEYPTAK                          | 834      | 846  | 1              | 55.49         | 1              | 62.15         | 1              | 58.91         |
| QDYADLANMLGLGGNTVDEK                   | 847      | 866  | 3              | 117.60        | 4              | 133.25        | 3              | 100.77        |
| LIEAVEELK                              | 870      | 878  |                |               |                |               | 1              | 44.04         |
| LIEAVEELKAK                            | 870      | 880  | 2              | 62.52         | 1              | 45.87         |                |               |
| VDIPPTIK                               | 881      | 888  | 1              | 25.51         |                |               |                |               |
| EIFNDPKVDADFLANVDALAEDAFDDQCTGANPR     | 889      | 922  |                |               | 1              | 48.55         |                |               |
| VDADFLANVDALAEDAFDDQCTGANPR            | 896      | 922  | 2              | 111.57        | 3              | 114.74        | 1              | 111.70        |
| YPLMADLK                               | 923      | 930  | 2              | 33.37         |                |               | 1              | 27.48         |
| QLYLDAAHAPILPVK                        | 931      | 945  | 2              | 64.38         |                |               | 2              | 54.53         |
| TLEFFSK                                | 946      | 952  | 1              | 29.82         |                |               |                |               |

•Tryptic peptides that match the ADHE sequence. Peptides are highlighted in blue. Residues highlighted in black are those which differ between the phytozome sequence (here; T, V) and the sequence in PubMed (accession number: CAF04128; residues A, T). The identification of tryptic peptide “VLIGEVEK” confirms the phytozome sequence. The catalytic center in the ALDH as well as the signatures for iron-binding in the ADH domain (See Figure 1) are underlined.

```

1  MMSSSLVSGKRVAVPSPAAPCAAVPLPRVAGRRRTAARVCEAAPSGAAPASPKAEAAAAPV
61  AAAPATPHAEVKKERAPATDEALTELKALLKRAQTAQAQYSTYTQEQVDEIFRAAAEAAN
121 AARIPLAKMAVEETRMGVAEDKVVKNHFASEFIYNKYKHTKTCGVIEHDPAGGIQKVAEP
181 VGVIAGIVPTTNPTSTAIFFKSLLSLKTRNALVLCPPRAAKSITAAARIVRDAAVAAGAP
241 PNIISWVETPSLPVSQALMQATEINLILATGGPAMVRAAYSSGNPSLGVGAGNTPALIDE
301 TADVAMAVSSILLSKTFDNGVICASEQSVVVVAKAYDAVRTEFVRRGAYFLTEDDKVKVR
361 AGVVVDGKLNPNIVGQSI PKLAALFGIKVPQGTKVLIGEVEKIGPEEALSQEKLCPILAM
421 YRAPDYDHGVKMACELIMYGAGHTSVLYTNPLNNAHIQQYQSAVKTVRILINTPASQGA
481 IGDLYNFHLDPSLTGCGTGWGSTSVSTNVGPQHLLNIKTVTARRENMLWFRVPPKIYFKG
541 GCLEVALTDLRGKSRAFIVTDKPLFDMGYADKVTHILDSINVHHQVFYHVTDPPTLACIE
601 AGLKEILEFKPDVIALGGGSPMDAAKIMWLMYECPDTRFDGLAMRFMDIRKRVYEVPEL
661 GKKATMVCIPPTSGTGSEVTPFSVVTDERLGAKYPLADYALTPSMATVDPQLVLNMPKKL
721 TAWGGIDALTHALESYVSI CATDYTKGLSREATISLLFKYLPAYANGSNDYLAREKVVHYA
781 ATIAGMAFANAFLGICHSMAHKLGAAHVPHGLANAALISHVIRYNATDMPAKQAAPQY
841 EYPTAKQDYADLANMLGLGGNTVDEKVIKLEAVEELKAKVDIPPTIKEIFNDPKVDADE
901 LANVDALAEDAFAFDDQCTGANPRYPLMADLKQLYLDAAHAAPILPVKTLFFFSKIN

```

**FIGURE S4.** Immunoblot analysis of cells incubated in dark anoxia in presence of sodium hypophosphite, an inhibitor of PFL.

Proteins (40  $\mu$ g) from dark anoxic *C. reinhardtii* cells were separated on urea/SDS-PAGE and transferred to nitrocellulose membrane. Detection of ADHE and PDC was performed by Western blotting. *Lane 1*, incubation for 6 h in AIB; *lane 2*, incubation for 24 h in AIB; *lane 3*, incubation 6 h in AIB supplemented with 10 mM NaPO<sub>2</sub>H<sub>2</sub>; *lane 4*, incubation 24 h in AIB supplemented with 10 mM NaPO<sub>2</sub>H<sub>2</sub>.

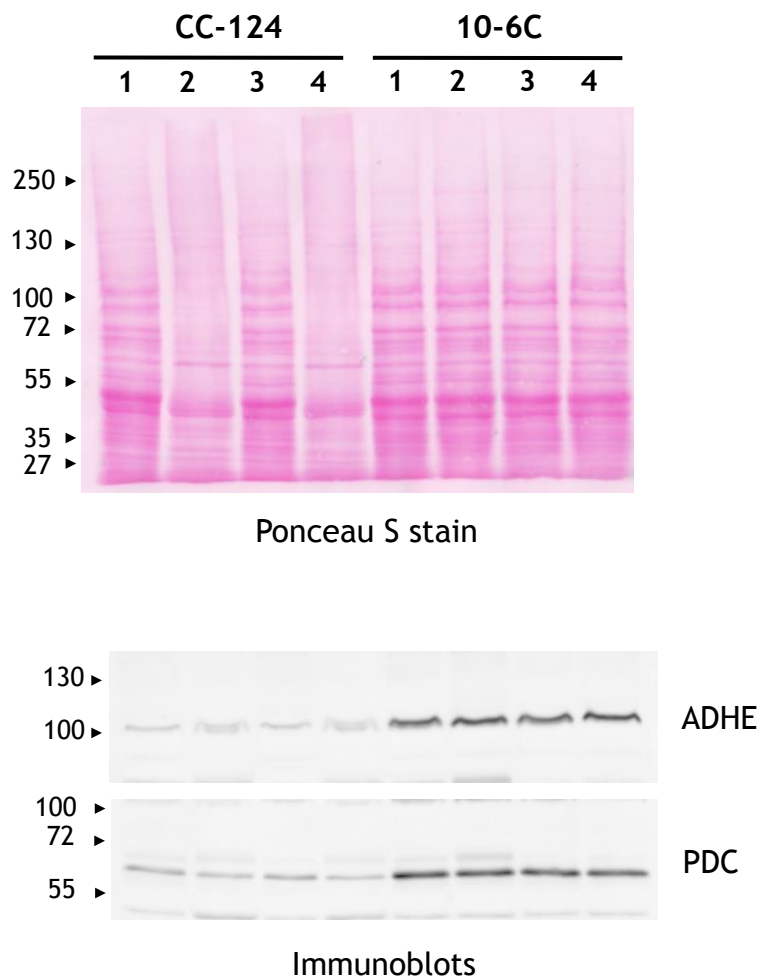

**FIGURE S5. ADHE abundance in conditions of zinc-deficiency.**

Protein analysis of *C. reinhardtii* cell extracts (40 µg). *Lane 1*, strain CC-124 grown on TAP medium; *lane 2*, strain CC-124 grown on zinc-deficient TAP medium; *lane 3*, strain 10-6C grown on TAP medium.

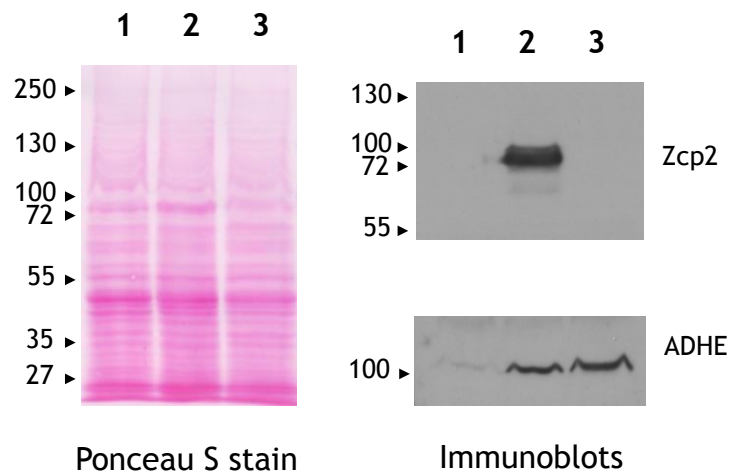

**FIGURE S6. Production of antibodies to *C. reinhardtii* phosphotransacetylases.**

●**Protein Overexpression and Antibody Production-** A partial sequence of *C. reinhardtii* PTA1 cDNA (coding for His<sup>492</sup>-Asn<sup>778</sup>; tPTA1) was amplified by PCR using oligonucleotide primers containing the EcoRI and HindIII restriction sites (underlined) as follows: 5'-GACGAATTCCACATCGTGCTGCCCCGAGTC -3', and 5'-GTCAAGCTTGTGCGTTCACCGGCTTGAGCAG -3'. The PCR product was cloned in pGEM-T Easy (Promega) and recloned in the BamHI/HindIII sites of the overexpression vector pET24a (Novagen). The resultant construct was introduced in *Escherichia coli* strain BL21 to produce the recombinant protein. His-tagged protein was purified under denaturing conditions using Ni-NTA matrix (Qiagen), as recommended by the supplier. Antibodies against tPTA1 were produced at Eurogentec (Leuven, Belgium).

●**Specificity of the produced antibodies-** In a fraction enriched in *C. reinhardtii* chloroplasts, the anti-PTA1 serum recognized two bands, which likely correspond to the two phosphotransacetylases PTA1 and PTA2 present in the alga.

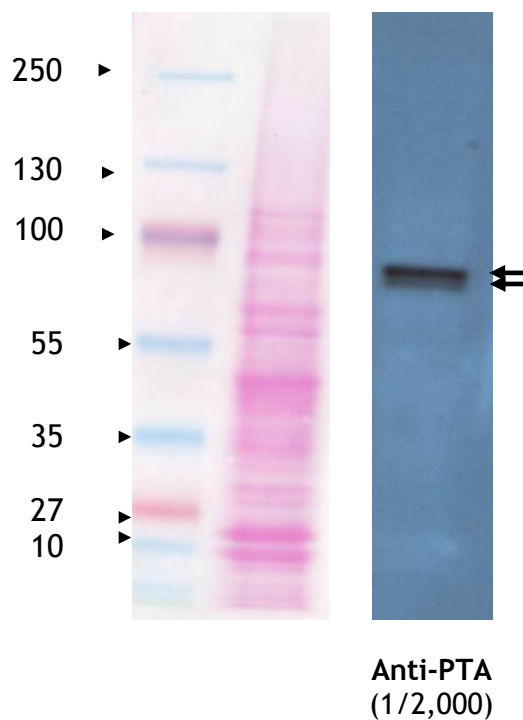



**FIGURE S7. Identification of *C. reinhardtii* PTAs by mass spectrometry.**

● Urea/SDS-PAGE loaded with a fraction enriched in chloroplasts. Chloroplasts were isolated from strain 10-6C and loaded on a urea/SDS-PAGE. The gel piece that contained the protein detected by the anti-PTA serum (see Supplemental Fig. S6) was subjected to nanoLC-MS/MS analysis.

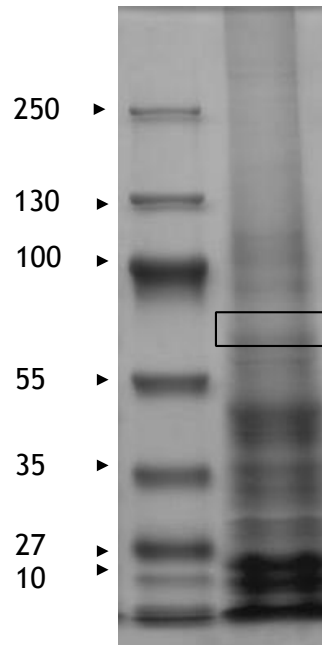

● Identification of PTAs by mass spectrometry

|      | accession          | score   | mass     | coverage | #peptides | emPAI |
|------|--------------------|---------|----------|----------|-----------|-------|
| PTA2 | Cre09.g396650.t1.1 | 2215,23 | 85020,14 | 54,58    | 29        | 3,56  |
| PTA1 | Cre17.g699000.t1.1 | 1977,00 | 86071,30 | 50,12    | 28        | 2,24  |

● Tryptic peptides that match *C. reinhardtii* PTAs. Peptides that match chloroplast PTA2 protein are highlighted in green; tryptic peptides that match mitochondrial PTA1 protein are highlighted in yellow. The underlined sequence correspond to tPTA1 used for antibody production.

```

PTA2      MSLNSSTMSRRQ---A-VAGAPAVAPFRHAGLFPRVRLCANRRVARVAP-KAAGNGNIAQ
PTA1      MAFASSSMAALSRLAAVSSGLGSALSRASQLLTSGSLSSSP TASHSSTRRFISDG-TVG
          *:: **:*: . * *:. . * * : *: *... .:: : : : :* .

PTA2      GEQGFDTLFLSDISLVGQRTPLLLGFFNYFERHLPVGGFFEPIAAEALASSELHIDRHVE
PTA1      SKGRPDSLFLSDISMSGHRAPLLLGWLNLYLERHLPVGGFFEPIGGRALAGSELSVDRHVE
          .: * :*****: * :* :*****: :* :*****:*****...**.* ** :*****

PTA2      LVYKVFNLKGDVRLAMTGVQDAEAARMIANGOHSELLDKIYSQYASYKEGQ--DLVLVEGP
PTA1      LMRYRVFMKGDATRMTGISDTEAAQLIASGKQSEVLDRIYAAYMAYKAGGELDLCLVEGP
          * :* :***:*** . ***: * :*****:*** :*****:*** : * :** * ** *****

PTA2      GPLMGGTELDAQIAAALNAPVLMTMTGQPNATVADYYNRAMVKRQVFLDHHVEVLGLVMN
PTA1      GPLMGGTELDAQIAAALNAPVLMAMSGRPNATANDYYNKAMVKRQVFADHKVDVLGVVIN
          *****:*****:*****:***** ***** ***** ** :* :*****:*
```

PTA2 GLPRQSHAILSGQLRDKFAAAGLPFAGAIPTDIMLRNVRLDEVQTAMGAQRLYGDSILLT  
PTA1 GLPREHHAIISSQLRDKLERAGLPFAGALPEDPVLSSVRLDEVRTALGATQLYGETWLGD  
\*\*\*\*:\*\*\*\*.\*\*\*\*:\*\*\*\*\*:\* \* :\* .\*\*\*\*\*:\*\*\*:\* :\*\*\*:\* \* \*

PTA2 VEFDDVVVASQRLEELLEILAERPMGRPLVVTADRLDIVLGLLAAQLSVSGPGVAGILL  
PTA1 VEFDEVVVGSRLEELLETLVERPMGRPLVVTADRDLIVLGLLAAQLSVRGPSVAGVLI  
\*\*\*\*:\*\*\*.\*\*\*\*\* \* .\*\*\*\*\*:\*\*\*\*\*:\*\*\*:\* \*

PTA2 TQAGSARSGRNYARDTIDRIFAGLSS-----SGLYKGSLLPVLVT  
PTA1 TQAGASRITRSYAKSAVDNIFAGLSNNTGASGGGPDGAAAANGSAQGSLYRGALLPVLST  
\*\*\*\*:\* \* .\*\*\*:\*\*\*:\*\*\*\*. .\*\*\*:\*\*\*\* \* \*

PTA2 DMPLRDAIRKLDNLDAAILPSSTRKISQCKRLEFYVDANAVVARLQNMVVRPNRMTPKMF  
PTA1 DKHLAEALAVIGRMDASILPTSIRKVTQCKMLFDKYIDANAVVTGLQK-SRPRVTPKMF  
\* \* :\* : :.\*\*\*:\*\*\*:\* \* :\*\*\*:\*\*\* \* :\*\*\*:\*\*\*\*\*: \*\* : \* .\*:\*\*\*\*\*

PTA2 MHTLKSMCNATPQHIVLPESEDKRVLAAAADVQRGLAKITLLGDPTTILAEAAKGLDLI  
PTA1 QHTMKAMCRASPQHIVLPESEVDKRVLAAAADVQTARGLARVTLGDPTTVQAEAKLGLDL  
\* :\* :\* .\*:\*\*\*\*\* \* :\*\*\*\*\*. \*\*\*\*\*:\*\*\*\*\*: \*\* \*\*\*\*\*

PTA2 SGCNIHNPNTSDRFDKYVDMLVEARKKKGMTREVAADTLHGDVNFATMMIVAGDADGMV  
PTA1 SGCHIHNPNSSDRFDKYVDMLVEARKKKGMTREAAAADTLHGDINFFGTMMVAAGDADGMV  
\*\*.\*.\*\*\*\*\*:\*\*\*\*\*:\*\*\*\*\*.\*\*\*\*\*:\*\*\*.\*\*\*:\*\*\*\*\*

PTA2 SGAVHTTASTVRPALQVLRSPDTPLVSSVFFMCLPDRVVVYGDCAVNVNPSAADLAQIAI  
PTA1 SGAIHTTASTIRPALQMLKNPASSLVSSIFFMCLPDRVLVYGDCAVNVSPSAADLAAIAT  
\*\*\*:\*\*\*\*\*:\*\*\*\*\*:\*\*\* \* : \*\*\*\*\*:\*\*\*\*\*:\*\*\*\*\*.\*\*\*\*\* \*\*

PTA2 TSNDTAAAFGIEPRVAMLSYSTLGSGSPDVQKVEAVAIVRQRRPDIKVEGPIQYDAAI  
PTA1 TSADTAAAFGIEPRVAMLSYSTLGSGAGPDVQKVTEAVALVKQRQDIKVEGPIQYDAAI  
\*\* \*\*\*\*\*:\*\*\*\*\*:\*\*\*\*\*:\*\*\*\*\*:\*\*\*:\*\*\*:\*\*\*\*\*

PTA2 DPKVAAVKVOGLSEVAGKATVFIFFPDLNTGNNTYKAVQQSTGAIAMGPVMQGLLRPVNDI  
PTA1 DPAVAAVKVKGGSEVAGRATVVFVFPDLNTGNNTYKAVQQSTGAIAMGPVMQGLLKPVDLI  
\*\* \*\*\*\*\*: \* \*\*\*\*\*:\*\*\*:\*\*\*\*\*:\*\*\*\*\*:\*\*\*\*\*:\*\*\*\*\*:\*\*\*\*\*

PTA2 SRGCTVPDIINTICVTSIQASRMSAARAAAACAABAAV\*  
PTA1 SRGCTVPDIVNTICVTSIQAMQFKQRTQAAVAAAAAPK\*-  
\*\*\*\*\*:\*\*\*\*\* :... :\*\*\*: \* \*\*.
